# Supplementary figures and images for: Insights into bread melanoidins: fate in the upper digestive tract and impact on the gut microbiota using in vitro systems
Source: Royal Society of Chemistry journal article supplement (doi:10.1039/c5fo00836k), 2015-01-01

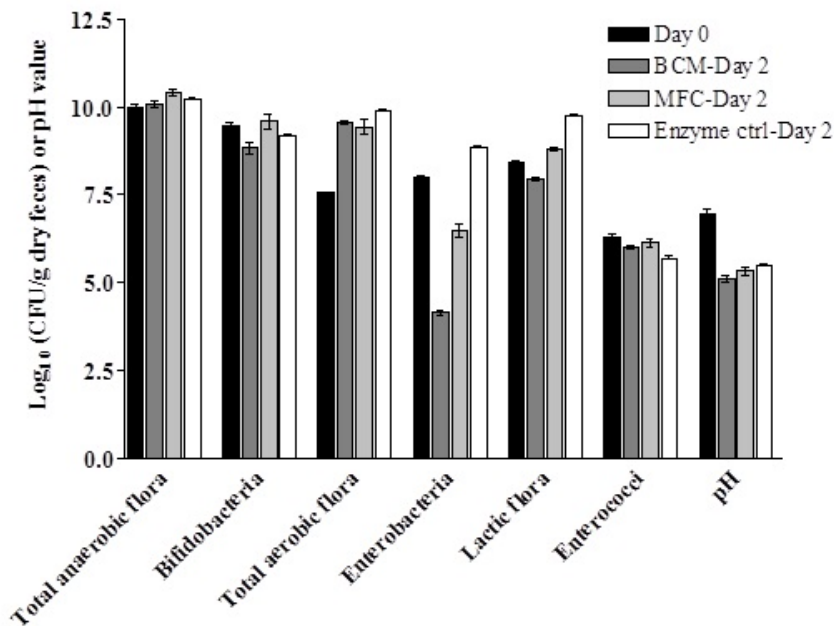

Supplement: c5fo00836k1.pdf [file c5fo00836k1.pdf]

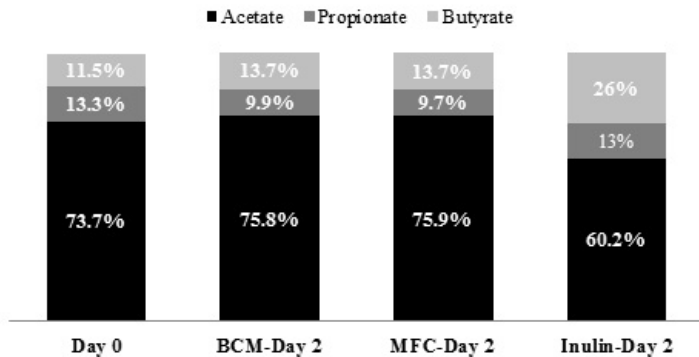

Supplement: c5fo00836k2.pdf [file c5fo00836k2.pdf]

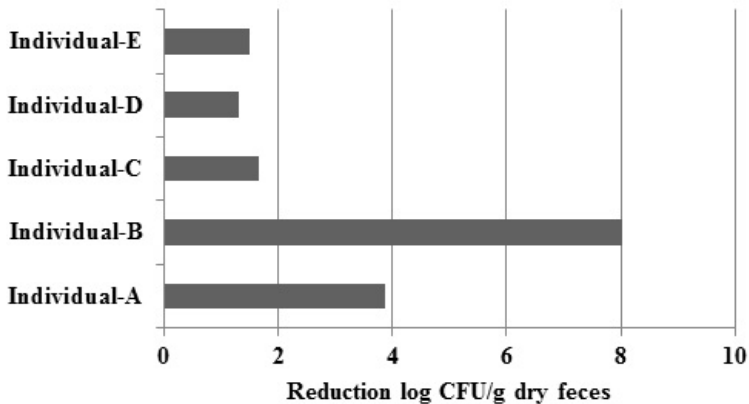

Supplement: c5fo00836k3.pdf [file c5fo00836k3.pdf]
